# Supplementary material
Source: PubMed Central journal article supplement (PMC8694567)
Supplement: NIHMS1716753-supplement-Supplemental_Material.pdf [file NIHMS1716753-supplement-Supplemental_Material.pdf]

Table S1. Results from Multiple Hierarchical Regression Analyses Predicting Global Self-worth from Concurrent Friend Social Support and Mother Social Support for Sample 1.

| Predictors                                                         | Step 1                         |          |               | Step 2                         |          |               | Step 3                         |          |               |
|--------------------------------------------------------------------|--------------------------------|----------|---------------|--------------------------------|----------|---------------|--------------------------------|----------|---------------|
|                                                                    | $\beta$ (SE)<br>[95% CI]       | <i>p</i> | Cohen's $f^2$ | $\beta$ (SE)<br>[95% CI]       | <i>p</i> | Cohen's $f^2$ | $\beta$ (SE)<br>[95% CI]       | <i>p</i> | Cohen's $f^2$ |
| <i>Main Effects</i>                                                |                                |          |               |                                |          |               |                                |          |               |
| Intercept                                                          | -0.04 (0.04)<br>[-0.11, 0.04]  | 0.32     | --            | -0.06 (0.04)<br>[-0.14, 0.03]  | 0.18     | --            | -0.06 (0.04)<br>[-0.14, 0.03]  | 0.18     | --            |
| Mother Social Support                                              | 0.32 (0.04)<br>[0.25, 0.40]    | <0.01    | 0.12          | 0.33 (0.04)<br>[0.25, 0.40]    | <0.01    | 0.13          | 0.31 (0.04)<br>[0.23, 0.40]    | <0.01    | 0.11          |
| Friend Social Support                                              | 0.08 (0.04)<br>[-0.01, 0.16]   | 0.09     | 0.01          | 0.08 (0.05)<br>[-0.01, 0.17]   | 0.08     | 0.01          | 0.08 (0.05)<br>[-0.01, 0.17]   | 0.08     | 0.01          |
| Child Gender                                                       | -0.18 (0.04)<br>[-0.26, -0.11] | <0.01    | 0.04          | -0.18 (0.04)<br>[-0.25, -0.11] | <0.01    | 0.04          | -0.19 (0.04)<br>[-0.27, -0.11] | <0.01    | 0.04          |
| <i>Two-way Interactions</i>                                        |                                |          |               |                                |          |               |                                |          |               |
| Mother Social Support<br>X Friend Social Support                   |                                |          |               | -0.01 (0.04)<br>[-0.09, 0.07]  | 0.82     | <0.01         | -0.01 (0.04)<br>[-0.09, 0.07]  | 0.87     | <0.01         |
| Mother Social Support<br>X Child Gender                            |                                |          |               | 0.02 (0.04)<br>[-0.07, 0.10]   | 0.67     | <0.01         | 0.02 (0.04)<br>[-0.07, 0.10]   | 0.67     | <0.01         |
| Friend Social Support<br>X Child Gender                            |                                |          |               | 0.06 (0.04)<br>[-0.03, 0.14]   | 0.16     | <0.01         | 0.06 (0.04)<br>[-0.03, 0.14]   | 0.17     | <0.01         |
| <i>Three-way Interactions</i>                                      |                                |          |               |                                |          |               |                                |          |               |
| Mother Social Support<br>X Friend Social Support<br>X Child Gender |                                |          |               |                                |          |               | 0.03 (0.04)<br>[-0.06, 0.11]   | 0.54     | <0.01         |
| <i>Model R<sup>2</sup></i>                                         |                                | <0.01    | 0.15          |                                | <0.01    | 0.15          |                                | <0.01    | 0.15          |

Note:  $N = 800$ . Standardized regression coefficients are reported. Child gender was originally coded as 1 = male, 2 = female.

Table S2. Results from Multiple Hierarchical Regression Analyses Predicting Global Self-worth from Concurrent Friend Social Support and Mother Social Support for Sample 2.

| Predictors                                                         | Step 1                         |          |               | Step 2                         |          |               | Step 3                         |          |               |
|--------------------------------------------------------------------|--------------------------------|----------|---------------|--------------------------------|----------|---------------|--------------------------------|----------|---------------|
|                                                                    | $\beta$ (SE)<br>[95% CI]       | <i>p</i> | Cohen's $f^2$ | $\beta$ (SE)<br>[95% CI]       | <i>p</i> | Cohen's $f^2$ | $\beta$ (SE)<br>[95% CI]       | <i>p</i> | Cohen's $f^2$ |
| <i>Main Effects</i>                                                |                                |          |               |                                |          |               |                                |          |               |
| Intercept                                                          | 0.01 (0.05)<br>[-0.08, 0.11]   | 0.81     | --            | 0.03 (0.05)<br>[-0.07, 0.13]   | 0.54     | --            | 0.03 (0.05)<br>[-0.07, 0.13]   | 0.56     | --            |
| Mother Social Support                                              | 0.20 (0.05)<br>[0.09, 0.30]    | <0.01    | 0.04          | 0.20 (0.05)<br>[0.09, 0.30]    | <0.01    | 0.04          | 0.21 (0.06)<br>[0.10, 0.33]    | <0.01    | 0.05          |
| Friend Social Support                                              | 0.15 (0.06)<br>[0.05, 0.26]    | <0.01    | 0.02          | 0.15 (0.06)<br>[0.04, 0.27]    | <0.01    | 0.02          | 0.16 (0.06)<br>[0.05, 0.27]    | <0.01    | 0.03          |
| Child Gender                                                       | -0.14 (0.05)<br>[-0.24, -0.04] | <0.01    | 0.02          | -0.14 (0.05)<br>[-0.24, -0.04] | <0.01    | 0.02          | -0.13 (0.05)<br>[-0.23, -0.03] | 0.01     | 0.02          |
| <i>Two-way Interactions</i>                                        |                                |          |               |                                |          |               |                                |          |               |
| Mother Social Support<br>X Friend Social Support                   |                                |          |               | -0.09 (0.06)<br>[-0.20, 0.03]  | 0.14     | 0.01          | -0.08 (0.06)<br>[-0.20, 0.03]  | 0.14     | 0.01          |
| Mother Social Support<br>X Child Gender                            |                                |          |               | -0.04 (0.06)<br>[-0.15, 0.07]  | 0.50     | <0.01         | -0.04 (0.06)<br>[-0.15, 0.07]  | 0.46     | <0.01         |
| Friend Social Support<br>X Child Gender                            |                                |          |               | 0.00 (0.06)<br>[-0.11, 0.12]   | 0.96     | <0.01         | 0.00 (0.06)<br>[-0.11, 0.12]   | 0.94     | <0.01         |
| <i>Three-way Interactions</i>                                      |                                |          |               |                                |          |               |                                |          |               |
| Mother Social Support<br>X Friend Social Support<br>X Child Gender |                                |          |               |                                |          |               | -0.07 (0.06)<br>[-0.19, 0.05]  | 0.27     | 0.01          |
| <i>Model R<sup>2</sup></i>                                         |                                | <0.01    | 0.08          |                                | <0.01    | 0.09          |                                | <0.01    | 0.09          |

Note:  $N = 415$ . Standardized regression coefficients are reported. Child gender was originally coded as 1 = male, 2 = female.

Table S3. Results from Multiple Hierarchical Regression Analyses Predicting Global Self-worth from Concurrent Friend Social Support and Mother Social Support for Sample 3.

| Predictors                                                         | Step 1                        |          |               | Step 2                        |          |               | Step 3                        |          |               |
|--------------------------------------------------------------------|-------------------------------|----------|---------------|-------------------------------|----------|---------------|-------------------------------|----------|---------------|
|                                                                    | $\beta$ (SE)<br>[95% CI]      | <i>p</i> | Cohen's $f^2$ | $\beta$ (SE)<br>[95% CI]      | <i>p</i> | Cohen's $f^2$ | $\beta$ (SE)<br>[95% CI]      | <i>p</i> | Cohen's $f^2$ |
| <i>Main Effects</i>                                                |                               |          |               |                               |          |               |                               |          |               |
| Intercept                                                          | 0.00 (0.06)<br>[-0.11, 0.11]  | 0.96     | --            | -0.02 (0.06)<br>[-0.13, 0.10] | 0.77     | --            | -0.04 (0.06)<br>[-0.16, 0.08] | 0.49     | --            |
| Mother Social Support                                              | 0.19 (0.06)<br>[0.07, 0.30]   | <0.01    | 0.04          | 0.22 (0.07)<br>[0.08, 0.35]   | <0.01    | 0.05          | 0.28 (0.08)<br>[0.13, 0.44]   | <0.01    | 0.09          |
| Friend Social Support                                              | 0.12 (0.06)<br>[-0.01, 0.23]  | 0.06     | 0.02          | 0.14 (0.06)<br>[0.02, 0.26]   | 0.03     | 0.02          | 0.14 (0.06)<br>[0.01, 0.26]   | 0.03     | 0.02          |
| Child Gender                                                       | -0.03 (0.06)<br>[-0.14, 0.08] | 0.62     | <0.01         | -0.03 (0.06)<br>[-0.14, 0.09] | 0.63     | <0.01         | 0.01 (0.06)<br>[-0.11, 0.13]  | 0.83     | <0.01         |
| <i>Two-way Interactions</i>                                        |                               |          |               |                               |          |               |                               |          |               |
| Mother Social Support<br>X Friend Social Support                   |                               |          |               | 0.04 (0.04)<br>[-0.04, 0.13]  | 0.28     | <0.01         | 0.09 (0.05)<br>[0.00, 0.18]   | 0.06     | 0.01          |
| Mother Social Support<br>X Child Gender                            |                               |          |               | 0.09 (0.06)<br>[-0.04, 0.21]  | 0.17     | 0.01          | -0.02 (0.08)<br>[-0.18, 0.14] | 0.83     | <0.01         |
| Friend Social Support<br>X Child Gender                            |                               |          |               | -0.04 (0.06)<br>[-0.16, 0.09] | 0.55     | <0.01         | -0.04 (0.06)<br>[-0.17, 0.08] | 0.51     | <0.01         |
| <i>Three-way Interactions</i>                                      |                               |          |               |                               |          |               |                               |          |               |
| Mother Social Support<br>X Friend Social Support<br>X Child Gender |                               |          |               |                               |          |               | -0.10 (0.05)<br>[-0.19, 0.00] | 0.05     | 0.01          |
| <i>Model R<sup>2</sup></i>                                         |                               | <0.01    | 0.06          |                               | <0.01    | 0.07          |                               | <0.01    | 0.09          |

Note:  $N = 313$ . Standardized regression coefficients are reported. Child gender was originally coded as 1 = male, 2 = female.

Table S4. Results from Multiple Hierarchical Regression Analyses Predicting Changes in Global Self-worth from Antecedent NRI Friend Social Support and NRI Mother Social Support for Sample 2.

| Predictors                                                         | Step 1                        |          |               | Step 2                        |          |               | Step 3                        |          |               |
|--------------------------------------------------------------------|-------------------------------|----------|---------------|-------------------------------|----------|---------------|-------------------------------|----------|---------------|
|                                                                    | $\beta$ (SE)<br>[95% CI]      | <i>p</i> | Cohen's $f^2$ | $\beta$ (SE)<br>[95% CI]      | <i>p</i> | Cohen's $f^2$ | $\beta$ (SE)<br>[95% CI]      | <i>p</i> | Cohen's $f^2$ |
| <i>Main Effects</i>                                                |                               |          |               |                               |          |               |                               |          |               |
| Intercept                                                          | -0.10 (0.09)<br>[-0.28, 0.07] | 0.23     | --            | -0.10 (0.10)<br>[-0.29, 0.10] | 0.33     | --            | -0.10 (0.10)<br>[-0.29, 0.09] | 0.29     | --            |
| Global Self-Worth T1                                               | 0.52 (0.08)<br>[0.35, 0.68]   | <0.01    | 0.41          | 0.51 (0.09)<br>[0.34, 0.68]   | <0.01    | 0.41          | 0.53 (0.09)<br>[0.36, 0.71]   | <0.01    | 0.44          |
| Mother Social Support T1                                           | 0.09 (0.09)<br>[-0.10, 0.27]  | 0.35     | 0.01          | 0.10 (0.11)<br>[-0.11, 0.32]  | 0.34     | 0.02          | 0.10 (0.11)<br>[-0.11, 0.32]  | 0.34     | 0.02          |
| Friend Social Support T1                                           | -0.03 (0.09)<br>[-0.21, 0.15] | 0.73     | <0.01         | -0.04 (0.09)<br>[-0.22, 0.14] | 0.68     | <0.01         | -0.04 (0.09)<br>[-0.22, 0.14] | 0.65     | <0.01         |
| Child Gender                                                       | -0.02 (0.08)<br>[-0.17, 0.13] | 0.80     | <0.01         | -0.03 (0.08)<br>[-0.18, 0.12] | 0.71     | <0.01         | 0.01 (0.08)<br>[-0.16, 0.17]  | 0.93     | <0.01         |
| <i>Two-way Interactions</i>                                        |                               |          |               |                               |          |               |                               |          |               |
| Mother Social Support<br>X Friend Social Support                   |                               |          |               | 0.03 (0.08)<br>[-0.12, 0.19]  | 0.66     | <0.01         | 0.07 (0.08)<br>[-0.09, 0.23]  | 0.39     | 0.01          |
| Mother Social Support<br>X Child Gender                            |                               |          |               | 0.08 (0.08)<br>[-0.08, 0.23]  | 0.34     | 0.01          | 0.04 (0.09)<br>[-0.13, 0.21]  | 0.66     | <0.01         |
| Friend Social Support<br>X Child Gender                            |                               |          |               | -0.10 (0.08)<br>[-0.26, 0.06] | 0.21     | 0.02          | -0.11 (0.08)<br>[-0.27, 0.05] | 0.18     | 0.02          |
| <i>Three-way Interactions</i>                                      |                               |          |               |                               |          |               |                               |          |               |
| Mother Social Support<br>X Friend Social Support<br>X Child Gender |                               |          |               |                               |          |               | -0.08 (0.07)<br>[-0.23, 0.06] | 0.26     | 0.01          |
| <i>Model R<sup>2</sup></i>                                         |                               | <0.01    | 0.34          |                               | <0.01    | 0.36          |                               | <0.01    | 0.37          |

Note:  $N = 165$ . Standardized regression coefficients are reported. Child gender was originally coded as 1 = male, 2 = female.

Table S5. Results from Multiple Hierarchical Regression Analyses Predicting Changes in Global Self-worth from Antecedent NRI Friend Social Support and NRI Mother Social Support for Sample 3.

| Predictors                                                         | Step 1                        |          |               | Step 2                        |          |               | Step 3                        |          |               |
|--------------------------------------------------------------------|-------------------------------|----------|---------------|-------------------------------|----------|---------------|-------------------------------|----------|---------------|
|                                                                    | $\beta$ (SE)<br>[95% CI]      | <i>p</i> | Cohen's $f^2$ | $\beta$ (SE)<br>[95% CI]      | <i>p</i> | Cohen's $f^2$ | $\beta$ (SE)<br>[95% CI]      | <i>p</i> | Cohen's $f^2$ |
| <i>Main Effects</i>                                                |                               |          |               |                               |          |               |                               |          |               |
| Intercept                                                          | -0.06 (0.06)<br>[-0.17, 0.05] | 0.28     | --            | -0.05 (0.06)<br>[-0.17, 0.07] | 0.39     | --            | -0.05 (0.06)<br>[-0.17, 0.07] | 0.38     | --            |
| Global Self-Worth T1                                               | 0.38 (0.06)<br>[0.27, 0.49]   | <0.01    | 0.18          | 0.39 (0.06)<br>[0.28, 0.50]   | <0.01    | 0.19          | 0.39 (0.06)<br>[0.27, 0.50]   | <0.01    | 0.19          |
| Mother Social Support T1                                           | 0.10 (0.06)<br>[-0.02, 0.22]  | 0.11     | 0.01          | 0.09 (0.07)<br>[-0.05, 0.22]  | 0.23     | 0.01          | 0.09 (0.08)<br>[-0.06, 0.24]  | 0.22     | 0.01          |
| Friend Social Support T1                                           | 0.02 (0.06)<br>[-0.10, 0.13]  | 0.80     | <0.01         | 0.01 (0.06)<br>[-0.11, 0.13]  | 0.90     | <0.01         | 0.01 (0.06)<br>[-0.11, 0.13]  | 0.90     | <0.01         |
| Child Gender                                                       | -0.07 (0.06)<br>[-0.18, 0.04] | 0.21     | 0.01          | -0.07 (0.06)<br>[-0.18, 0.04] | 0.21     | <0.01         | -0.06 (0.06)<br>[-0.18, 0.05] | 0.27     | <0.01         |
| <i>Two-way Interactions</i>                                        |                               |          |               |                               |          |               |                               |          |               |
| Mother Social Support<br>X Friend Social Support                   |                               |          |               | -0.01 (0.04)<br>[-0.09, 0.07] | 0.86     | <0.01         | 0.00 (0.04)<br>[-0.09, 0.08]  | 0.96     | <0.01         |
| Mother Social Support<br>X Child Gender                            |                               |          |               | -0.04 (0.07)<br>[-0.17, 0.09] | 0.56     | <0.01         | -0.05 (0.08)<br>[-0.21, 0.11] | 0.51     | <0.01         |
| Friend Social Support<br>X Child Gender                            |                               |          |               | -0.01 (0.06)<br>[-0.13, 0.11] | 0.87     | <0.01         | -0.01 (0.06)<br>[-0.13, 0.11] | 0.86     | <0.01         |
| <i>Three-way Interactions</i>                                      |                               |          |               |                               |          |               |                               |          |               |
| Mother Social Support<br>X Friend Social Support<br>X Child Gender |                               |          |               |                               |          |               | -0.01 (0.05)<br>[-0.11, 0.08] | 0.77     | <0.01         |
| <i>Model R<sup>2</sup></i>                                         |                               | <0.01    | 0.19          |                               | <0.01    | 0.19          |                               | <0.01    | 0.19          |

Note:  $N = 313$ . Standardized regression coefficients are reported. Child gender was originally coded as 1 = male, 2 = female.

Table S6. Results from Multiple Hierarchical Regression Analyses Predicting Global Self-worth from Concurrent Friend Social Support and Family Cohesion and Family Adaptability for Sample 3.

| Predictors                                                       | Step 1                        |          |               | Step 2                        |          |               | Step 3                        |          |               |
|------------------------------------------------------------------|-------------------------------|----------|---------------|-------------------------------|----------|---------------|-------------------------------|----------|---------------|
|                                                                  | $\beta$ (SE)<br>[95% CI]      | <i>p</i> | Cohen's $f^2$ | $\beta$ (SE)<br>[95% CI]      | <i>p</i> | Cohen's $f^2$ | $\beta$ (SE)<br>[95% CI]      | <i>p</i> | Cohen's $f^2$ |
| <i>Main Effects</i>                                              |                               |          |               |                               |          |               |                               |          |               |
| Intercept                                                        | 0.00 (0.06)<br>[-0.12, 0.11]  | 0.96     | --            | -0.02 (0.07)<br>[-0.16, 0.12] | 0.79     | --            | -0.02 (0.07)<br>[-0.16, 0.12] | 0.79     | --            |
| Family Cohesion                                                  | 0.16 (0.11)<br>[-0.06, 0.37]  | 0.15     | 0.03          | 0.16 (0.11)<br>[-0.06, 0.39]  | 0.16     | 0.03          | 0.16 (0.12)<br>[-0.08, 0.39]  | 0.18     | 0.03          |
| Family Adaptability                                              | -0.07 (0.10)<br>[-0.26, 0.13] | 0.49     | 0.01          | -0.06 (0.10)<br>[-0.26, 0.14] | 0.57     | <0.01         | -0.05 (0.11)<br>[-0.27, 0.16] | 0.64     | <0.01         |
| Friend Social Support                                            | 0.21 (0.06)<br>[0.09, 0.32]   | <0.01    | 0.05          | 0.21 (0.06)<br>[0.09, 0.33]   | <0.01    | 0.05          | 0.21 (0.06)<br>[0.09, 0.34]   | <0.01    | 0.05          |
| Child Gender                                                     | -0.02 (0.06)<br>[-0.13, 0.10] | 0.78     | <0.01         | -0.02 (0.06)<br>[-0.14, 0.10] | 0.74     | <0.01         | -0.02 (0.06)<br>[-0.14, 0.10] | 0.75     | <0.01         |
| <i>Two-way Interactions</i>                                      |                               |          |               |                               |          |               |                               |          |               |
| Family Cohesion<br>X Friend Social Support                       |                               |          |               | 0.06 (0.10)<br>[-0.13, 0.25]  | 0.53     | <0.01         | 0.06 (0.10)<br>[-0.13, 0.25]  | 0.55     | <0.01         |
| Family Adaptability<br>X Friend Social Support                   |                               |          |               | -0.07 (0.10)<br>[-0.27, 0.13] | 0.49     | 0.01          | -0.07 (0.10)<br>[-0.26, 0.13] | 0.52     | 0.01          |
| Family Cohesion<br>X Family Adaptability                         |                               |          |               | 0.05 (0.07)<br>[-0.09, 0.19]  | 0.50     | <0.01         | 0.05 (0.07)<br>[-0.09, 0.19]  | 0.49     | <0.01         |
| Family Cohesion<br>X Child Gender                                |                               |          |               | -0.01 (0.10)<br>[-0.21, 0.18] | 0.89     | <0.01         | -0.02 (0.10)<br>[-0.21, 0.18] | 0.86     | <0.01         |
| Family Adaptability<br>X Child Gender                            |                               |          |               | 0.06 (0.11)<br>[-0.16, 0.28]  | 0.59     | <0.01         | 0.06 (0.11)<br>[-0.16, 0.29]  | 0.58     | <0.01         |
| Friend Social Support<br>X Child Gender                          |                               |          |               | 0.00 (0.06)<br>[-0.12, 0.12]  | 0.97     | <0.01         | 0.00 (0.06)<br>[-0.13, 0.12]  | 0.96     | <0.01         |
| <i>Three-way Interactions</i>                                    |                               |          |               |                               |          |               |                               |          |               |
| Family Cohesion<br>X Friend Social Support<br>X Child Gender     |                               |          |               |                               |          |               | 0.02 (0.11)<br>[-0.20, 0.23]  | 0.89     | <0.01         |
| Family Adaptability<br>X Friend Social Support<br>X Child Gender |                               |          |               |                               |          |               | -0.03 (0.10)<br>[-0.23, 0.17] | 0.75     | <0.01         |
| <i>Model R<sup>2</sup></i>                                       |                               | <0.01    | 0.06          |                               | 0.01     | 0.07          |                               | 0.02     | 0.08          |

Note:  $N = 313$ . Standardized regression coefficients are reported. Child gender was originally coded as 1 = male, 2 = female.

Table S7. Results from Multiple Hierarchical Regression Analyses Predicting Global Self-worth from Concurrent Friend Social Support and Family Cohesion and Family Adaptability for Sample 4.

| Predictors                                                       | Step 1                        |          |               | Step 2                        |          |               | Step 3                        |          |               |
|------------------------------------------------------------------|-------------------------------|----------|---------------|-------------------------------|----------|---------------|-------------------------------|----------|---------------|
|                                                                  | $\beta$ (SE)<br>[95% CI]      | <i>p</i> | Cohen's $f^2$ | $\beta$ (SE)<br>[95% CI]      | <i>p</i> | Cohen's $f^2$ | $\beta$ (SE)<br>[95% CI]      | <i>p</i> | Cohen's $f^2$ |
| <i>Main Effects</i>                                              |                               |          |               |                               |          |               |                               |          |               |
| Intercept                                                        | -0.02 (0.07)<br>[-0.15, 0.12] | 0.83     | --            | -0.02 (0.08)<br>[-0.17, 0.14] | 0.81     | --            | -0.02 (0.08)<br>[-0.18, 0.14] | 0.79     | --            |
| Family Cohesion                                                  | 0.14 (0.08)<br>[-0.02, 0.29]  | 0.10     | 0.02          | 0.13 (0.09)<br>[-0.04, 0.30]  | 0.13     | 0.02          | 0.17 (0.10)<br>[-0.02, 0.35]  | 0.08     | 0.03          |
| Family Adaptability                                              | -0.12 (0.08)<br>[-0.27, 0.04] | 0.15     | 0.01          | -0.10 (0.08)<br>[-0.26, 0.06] | 0.22     | 0.01          | -0.13 (0.09)<br>[-0.31, 0.05] | 0.15     | 0.02          |
| Friend Social Support                                            | 0.14 (0.08)<br>[-0.01, 0.29]  | 0.07     | 0.02          | 0.15 (0.08)<br>[-0.01, 0.30]  | 0.07     | 0.02          | 0.14 (0.08)<br>[-0.02, 0.30]  | 0.09     | 0.02          |
| Child Gender                                                     | -0.11 (0.07)<br>[-0.25, 0.04] | 0.14     | 0.01          | -0.10 (0.08)<br>[-0.25, 0.04] | 0.16     | 0.01          | -0.11 (0.07)<br>[-0.25, 0.04] | 0.14     | 0.01          |
| <i>Two-way Interactions</i>                                      |                               |          |               |                               |          |               |                               |          |               |
| Family Cohesion<br>X Friend Social Support                       |                               |          |               | -0.08 (0.10)<br>[-0.28, 0.12] | 0.42     | 0.01          | -0.10 (0.10)<br>[-0.30, 0.10] | 0.34     | 0.01          |
| Family Adaptability<br>X Friend Social Support                   |                               |          |               | 0.04 (0.10)<br>[-0.16, 0.24]  | 0.69     | 0.01          | 0.06 (0.10)<br>[-0.15, 0.26]  | 0.57     | <0.01         |
| Family Cohesion<br>X Family Adaptability                         |                               |          |               | -0.06 (0.07)<br>[-0.20, 0.08] | 0.39     | <0.01         | -0.06 (0.07)<br>[-0.20, 0.08] | 0.40     | <0.01         |
| Family Cohesion<br>X Child Gender                                |                               |          |               | -0.12 (0.08)<br>[-0.28, 0.05] | 0.16     | 0.02          | -0.13 (0.09)<br>[-0.30, 0.04] | 0.13     | 0.02          |
| Family Adaptability<br>X Child Gender                            |                               |          |               | -0.04 (0.09)<br>[-0.21, 0.13] | 0.61     | <0.01         | -0.03 (0.09)<br>[-0.21, 0.14] | 0.72     | <0.01         |
| Friend Social Support<br>X Child Gender                          |                               |          |               | 0.08 (0.08)<br>[-0.07, 0.23]  | 0.29     | <0.01         | 0.08 (0.08)<br>[-0.06, 0.23]  | 0.26     | <0.01         |
| <i>Three-way Interactions</i>                                    |                               |          |               |                               |          |               |                               |          |               |
| Family Cohesion<br>X Friend Social Support<br>X Child Gender     |                               |          |               |                               |          |               | -0.09 (0.10)<br>[-0.29, 0.10] | 0.35     | <0.01         |
| Family Adaptability<br>X Friend Social Support<br>X Child Gender |                               |          |               |                               |          |               | 0.09 (0.10)<br>[-0.12, 0.29]  | 0.41     | <0.01         |
| <i>Model R<sup>2</sup></i>                                       |                               | 0.07     | 0.04          |                               | 0.07     | 0.07          |                               | 0.10     | 0.08          |

Note:  $N = 232$ . Standardized regression coefficients are reported. Child gender was originally coded as 1 = male, 2 = female.

Table S8. Results from Multiple Hierarchical Regression Analyses Predicting Changes in Global Self-worth from Antecedent Friend Social Support and Family Cohesion and Family Adaptability for Sample 3.

| Predictors                                                       | Step 1                        |          |               | Step 2                        |          |               | Step 3                        |          |               |
|------------------------------------------------------------------|-------------------------------|----------|---------------|-------------------------------|----------|---------------|-------------------------------|----------|---------------|
|                                                                  | $\beta$ (SE)<br>[95% CI]      | <i>p</i> | Cohen's $f^2$ | $\beta$ (SE)<br>[95% CI]      | <i>p</i> | Cohen's $f^2$ | $\beta$ (SE)<br>[95% CI]      | <i>p</i> | Cohen's $f^2$ |
| <i>Main Effects</i>                                              |                               |          |               |                               |          |               |                               |          |               |
| Intercept                                                        | -0.02 (0.06)<br>[-0.14, 0.10] | 0.73     | --            | -0.01 (0.07)<br>[-0.14, 0.13] | 0.91     | --            | -0.01 (0.07)<br>[-0.14, 0.13] | 0.95     | --            |
| Global Self-Worth T1                                             | 0.44 (0.06)<br>[0.33, 0.55]   | <0.01    | 0.26          | 0.45 (0.06)<br>[0.33, 0.56]   | <0.01    | 0.28          | 0.45 (0.06)<br>[0.33, 0.56]   | <0.01    | 0.28          |
| Family Cohesion T1                                               | 0.19 (0.08)<br>[0.03, 0.36]   | 0.03     | 0.05          | 0.20 (0.09)<br>[0.02, 0.37]   | 0.03     | 0.05          | 0.18 (0.09)<br>[0.01, 0.36]   | 0.04     | 0.04          |
| Family Adaptability T1                                           | -0.18 (0.10)<br>[-0.37, 0.02] | 0.08     | 0.04          | -0.17 (0.10)<br>[-0.37, 0.04] | 0.11     | 0.04          | -0.16 (0.10)<br>[-0.36, 0.04] | 0.12     | 0.04          |
| Friend Social Support T1                                         | 0.07 (0.06)<br>[-0.05, 0.19]  | 0.25     | 0.01          | 0.08 (0.06)<br>[-0.05, 0.20]  | 0.23     | 0.01          | 0.07 (0.06)<br>[-0.06, 0.20]  | 0.28     | 0.01          |
| Child Gender                                                     | -0.05 (0.06)<br>[-0.16, 0.06] | 0.35     | <0.01         | -0.06 (0.06)<br>[-0.17, 0.05] | 0.31     | <0.01         | -0.06 (0.06)<br>[-0.17, 0.05] | 0.32     | <0.01         |
| <i>Two-way Interactions</i>                                      |                               |          |               |                               |          |               |                               |          |               |
| Family Cohesion<br>X Friend Social Support                       |                               |          |               | -0.01 (0.09)<br>[-0.18, 0.15] | 0.87     | <0.01         | -0.02 (0.09)<br>[-0.20, 0.15] | 0.78     | <0.01         |
| Family Adaptability<br>X Friend Social Support                   |                               |          |               | 0.06 (0.09)<br>[-0.11, 0.23]  | 0.51     | <0.01         | 0.06 (0.09)<br>[-0.11, 0.23]  | 0.51     | <0.01         |
| Family Cohesion<br>X Family Adaptability                         |                               |          |               | -0.01 (0.06)<br>[-0.13, 0.12] | 0.92     | <0.01         | -0.01 (0.06)<br>[-0.13, 0.12] | 0.90     | <0.01         |
| Family Cohesion<br>X Child Gender                                |                               |          |               | -0.07 (0.10)<br>[-0.27, 0.12] | 0.46     | <0.01         | -0.07 (0.10)<br>[-0.27, 0.12] | 0.44     | 0.01          |
| Family Adaptability<br>X Child Gender                            |                               |          |               | 0.01 (0.10)<br>[-0.19, 0.20]  | 0.94     | <0.01         | 0.02 (0.10)<br>[-0.18, 0.21]  | 0.87     | <0.01         |
| Friend Social Support<br>X Child Gender                          |                               |          |               | -0.06 (0.06)<br>[-0.17, 0.06] | 0.36     | <0.01         | -0.05 (0.06)<br>[-0.17, 0.07] | 0.40     | <0.01         |
| <i>Three-way Interactions</i>                                    |                               |          |               |                               |          |               |                               |          |               |
| Family Cohesion<br>X Friend Social Support<br>X Child Gender     |                               |          |               |                               |          |               | 0.05 (0.08)<br>[-0.12, 0.21]  | 0.56     | <0.01         |
| Family Adaptability<br>X Friend Social Support<br>X Child Gender |                               |          |               |                               |          |               | 0.00 (0.09)<br>[-0.19, 0.18]  | 0.96     | <0.01         |
| <i>Model R<sup>2</sup></i>                                       |                               | <0.01    | 0.25          |                               | <0.01    | 0.27          |                               | <0.01    | 0.27          |



*Note:*  $N = 313$ . Standardized regression coefficients are reported. Child gender was originally coded as 1 = male, 2 = female.

Table S9. Results from Multiple Hierarchical Regression Analyses Predicting Changes in Global Self-worth from Antecedent Friend Social Support and Family Cohesion and Family Adaptability for Sample 4.

| Predictors                                                       | Step 1                        |          |               | Step 2                        |          |               | Step 3                        |          |               |
|------------------------------------------------------------------|-------------------------------|----------|---------------|-------------------------------|----------|---------------|-------------------------------|----------|---------------|
|                                                                  | $\beta$ (SE)<br>[95% CI]      | <i>p</i> | Cohen's $f^2$ | $\beta$ (SE)<br>[95% CI]      | <i>p</i> | Cohen's $f^2$ | $\beta$ (SE)<br>[95% CI]      | <i>p</i> | Cohen's $f^2$ |
| <i>Main Effects</i>                                              |                               |          |               |                               |          |               |                               |          |               |
| Intercept                                                        | 0.00 (0.05)<br>[-0.10, 0.10]  | 0.96     | --            | -0.01 (0.06)<br>[-0.13, 0.10] | 0.81     | --            | -0.02 (0.06)<br>[-0.14, 0.10] | 0.74     | --            |
| Global Self-Worth T1                                             | 0.62 (0.05)<br>[0.52, 0.73]   | <0.01    | 0.69          | 0.64 (0.05)<br>[0.53, 0.74]   | <0.01    | 0.78          | 0.64 (0.05)<br>[0.54, 0.74]   | <0.01    | 0.79          |
| Family Cohesion T1                                               | 0.17 (0.06)<br>[0.05, 0.29]   | <0.01    | 0.05          | 0.19 (0.07)<br>[0.05, 0.32]   | <0.01    | 0.07          | 0.19 (0.08)<br>[0.04, 0.34]   | 0.01     | 0.07          |
| Family Adaptability T1                                           | -0.05 (0.07)<br>[-0.17, 0.08] | 0.49     | <0.01         | -0.04 (0.07)<br>[-0.16, 0.09] | 0.58     | <0.01         | -0.01 (0.07)<br>[-0.15, 0.14] | 0.93     | <0.01         |
| Friend Social Support T1                                         | 0.04 (0.06)<br>[-0.07, 0.16]  | 0.45     | <0.01         | 0.02 (0.06)<br>[-0.10, 0.14]  | 0.71     | <0.01         | 0.03 (0.06)<br>[-0.09, 0.15]  | 0.61     | <0.01         |
| Child Gender                                                     | -0.05 (0.06)<br>[-0.16, 0.06] | 0.41     | <0.01         | -0.06 (0.06)<br>[-0.17, 0.06] | 0.33     | 0.01          | -0.05 (0.06)<br>[-0.17, 0.06] | 0.35     | <0.01         |
| <i>Two-way Interactions</i>                                      |                               |          |               |                               |          |               |                               |          |               |
| Family Cohesion<br>X Friend Social Support                       |                               |          |               | 0.13 (0.07)<br>[-0.01, 0.27]  | 0.08     | 0.03          | 0.14 (0.08)<br>[-0.01, 0.29]  | 0.08     | 0.04          |
| Family Adaptability<br>X Friend Social Support                   |                               |          |               | -0.14 (0.08)<br>[-0.30, 0.02] | 0.08     | 0.04          | -0.15 (0.09)<br>[-0.32, 0.02] | 0.09     | 0.04          |
| Family Cohesion<br>X Family Adaptability                         |                               |          |               | 0.10 (0.05)<br>[-0.01, 0.20]  | 0.06     | 0.02          | 0.09 (0.05)<br>[-0.01, 0.20]  | 0.09     | 0.02          |
| Family Cohesion<br>X Child Gender                                |                               |          |               | 0.04 (0.07)<br>[-0.08, 0.17]  | 0.51     | <0.01         | 0.05 (0.07)<br>[-0.08, 0.18]  | 0.43     | <0.01         |
| Family Adaptability<br>X Child Gender                            |                               |          |               | -0.04 (0.06)<br>[-0.17, 0.08] | 0.50     | <0.01         | -0.04 (0.07)<br>[-0.17, 0.09] | 0.51     | <0.01         |
| Friend Social Support<br>X Child Gender                          |                               |          |               | -0.06 (0.06)<br>[-0.18, 0.05] | 0.28     | <0.01         | -0.06 (0.06)<br>[-0.17, 0.06] | 0.34     | 0.01          |
| <i>Three-way Interactions</i>                                    |                               |          |               |                               |          |               |                               |          |               |
| Family Cohesion<br>X Friend Social Support<br>X Child Gender     |                               |          |               |                               |          |               | -0.01 (0.07)<br>[-0.16, 0.13] | 0.87     | <0.01         |
| Family Adaptability<br>X Friend Social Support<br>X Child Gender |                               |          |               |                               |          |               | -0.09 (0.08)<br>[-0.25, 0.06] | 0.24     | 0.02          |
| <i>Model R<sup>2</sup></i>                                       |                               | <0.01    | 0.44          |                               | <0.01    | 0.47          |                               | <0.01    | 0.48          |

*Note:*  $N = 232$ . Standardized regression coefficients are reported. Child gender was originally coded as 1 = male, 2 = female.

Figure S1. Follow-up plot depicting the nonsignificant interaction between friend social support and mother social support in the prediction of concurrent adolescent global self-worth

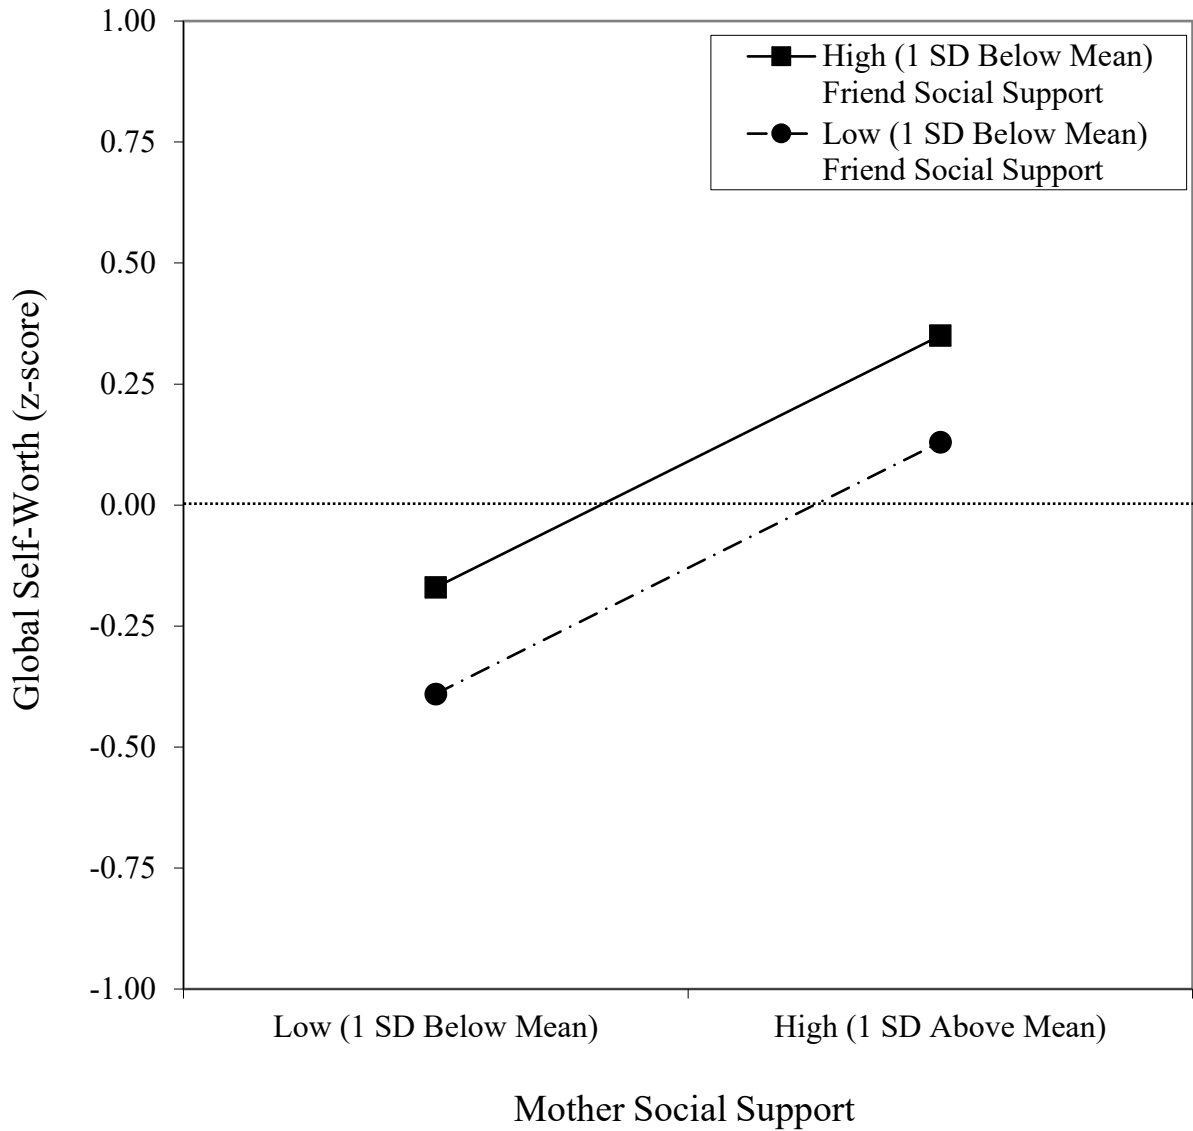

Note: N = 1528. K = 3 samples (samples 1, 2, and 3).

Figure S2. Follow-up plot depicting the nonsignificant interaction between Time 1 friend social support and Time 1 mother social support in the prediction of Time 2 adolescent global self-worth

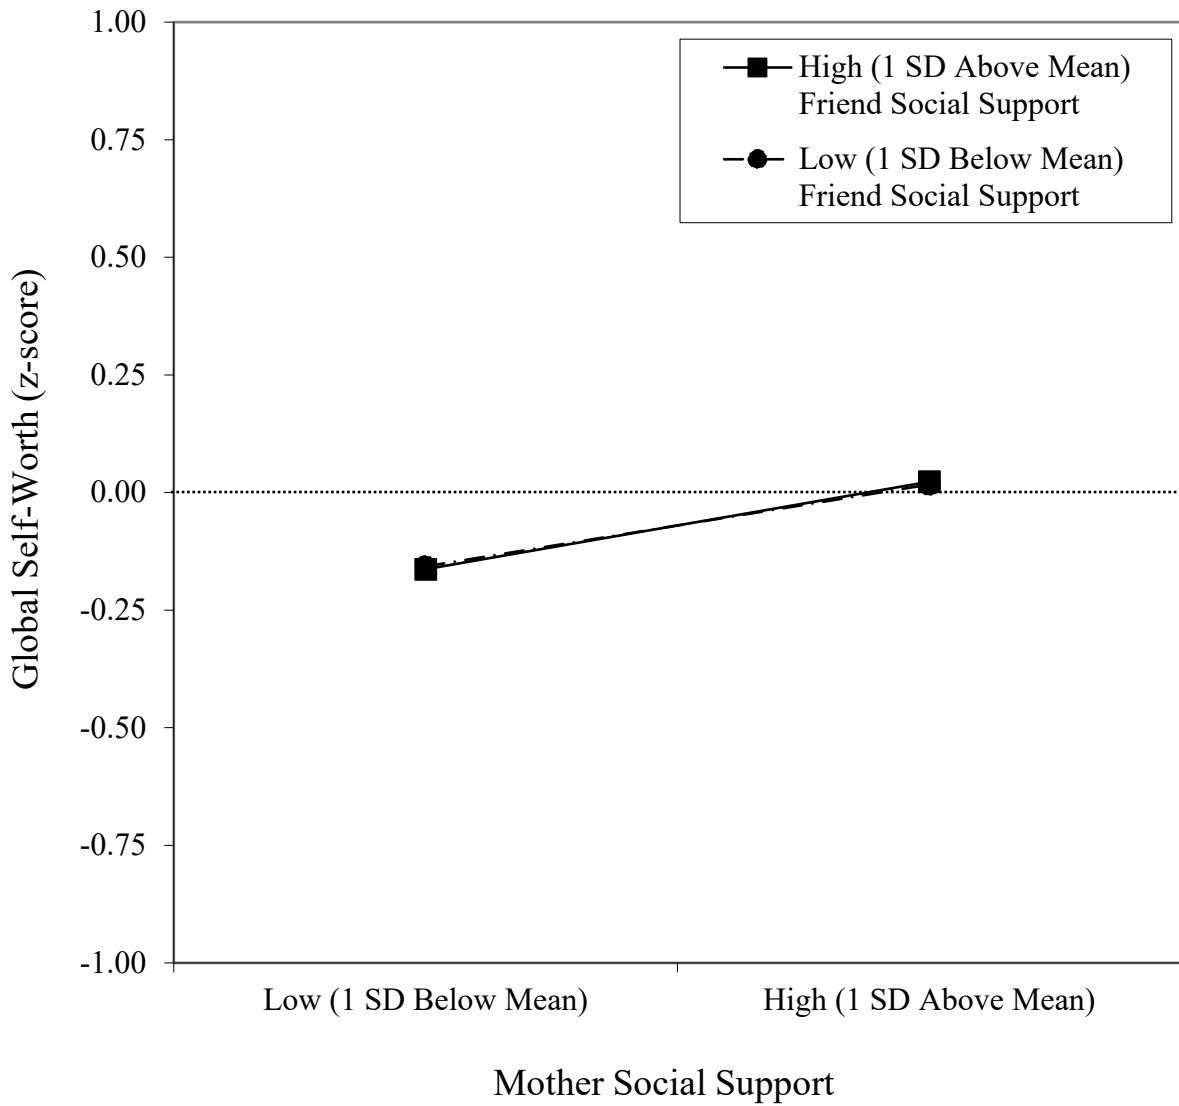

Note: N = 478. K = 2 samples (samples 2 and 3).

Figure S3. Follow-up plot depicting the nonsignificant interaction between friend social support and family cohesion in the prediction of concurrent adolescent global self-worth

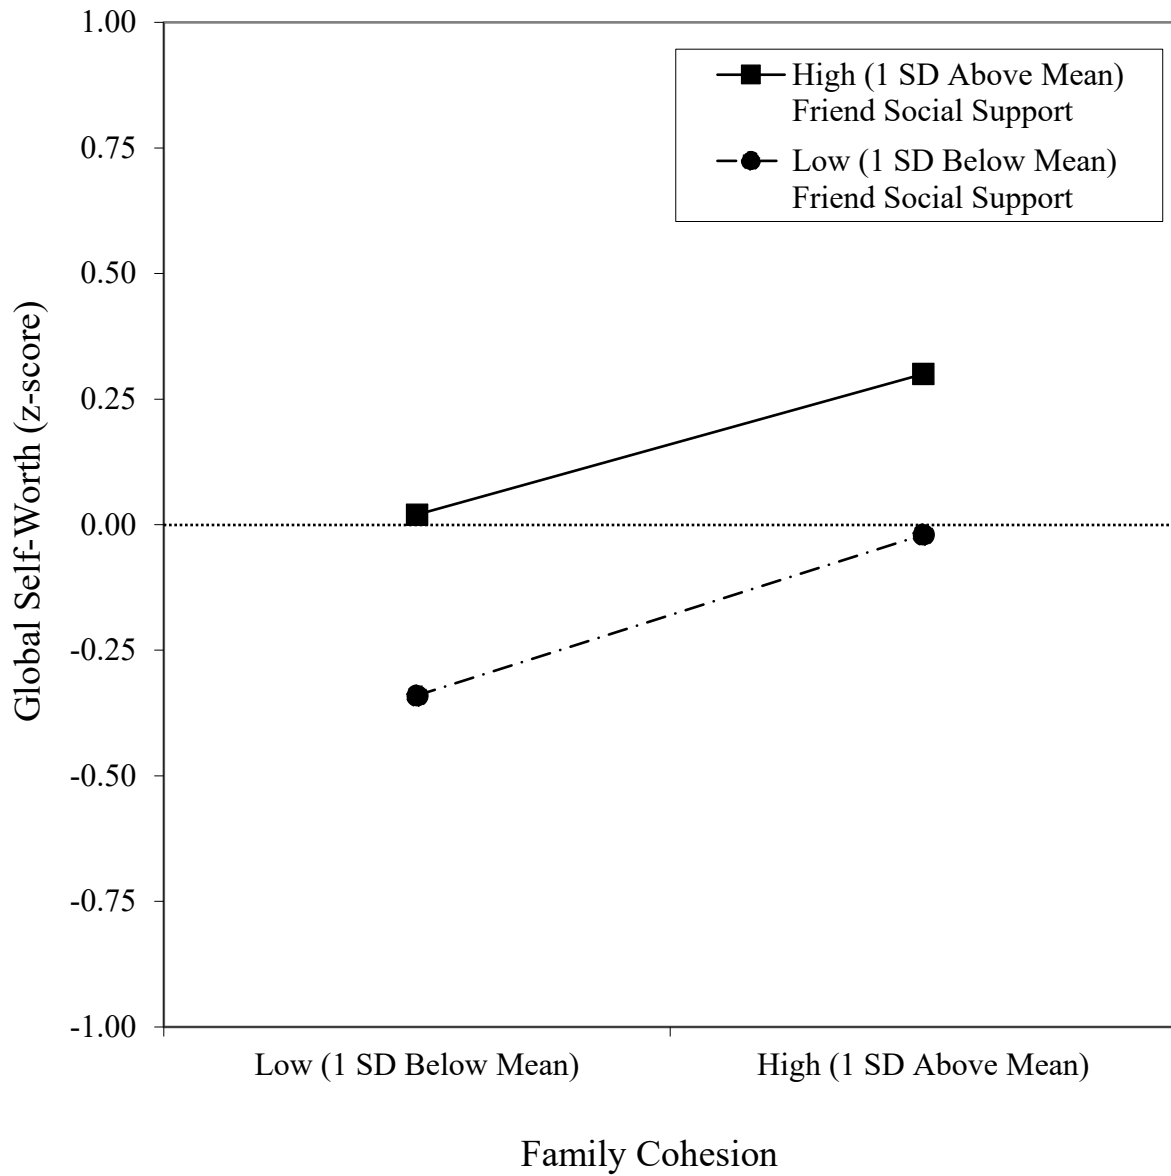

Note: N = 550. K = 2 samples (samples 3 and 4).

Figure S4. Follow-up plot depicting the nonsignificant interaction between friend social support and family adaptability in the prediction of concurrent adolescent global self-worth

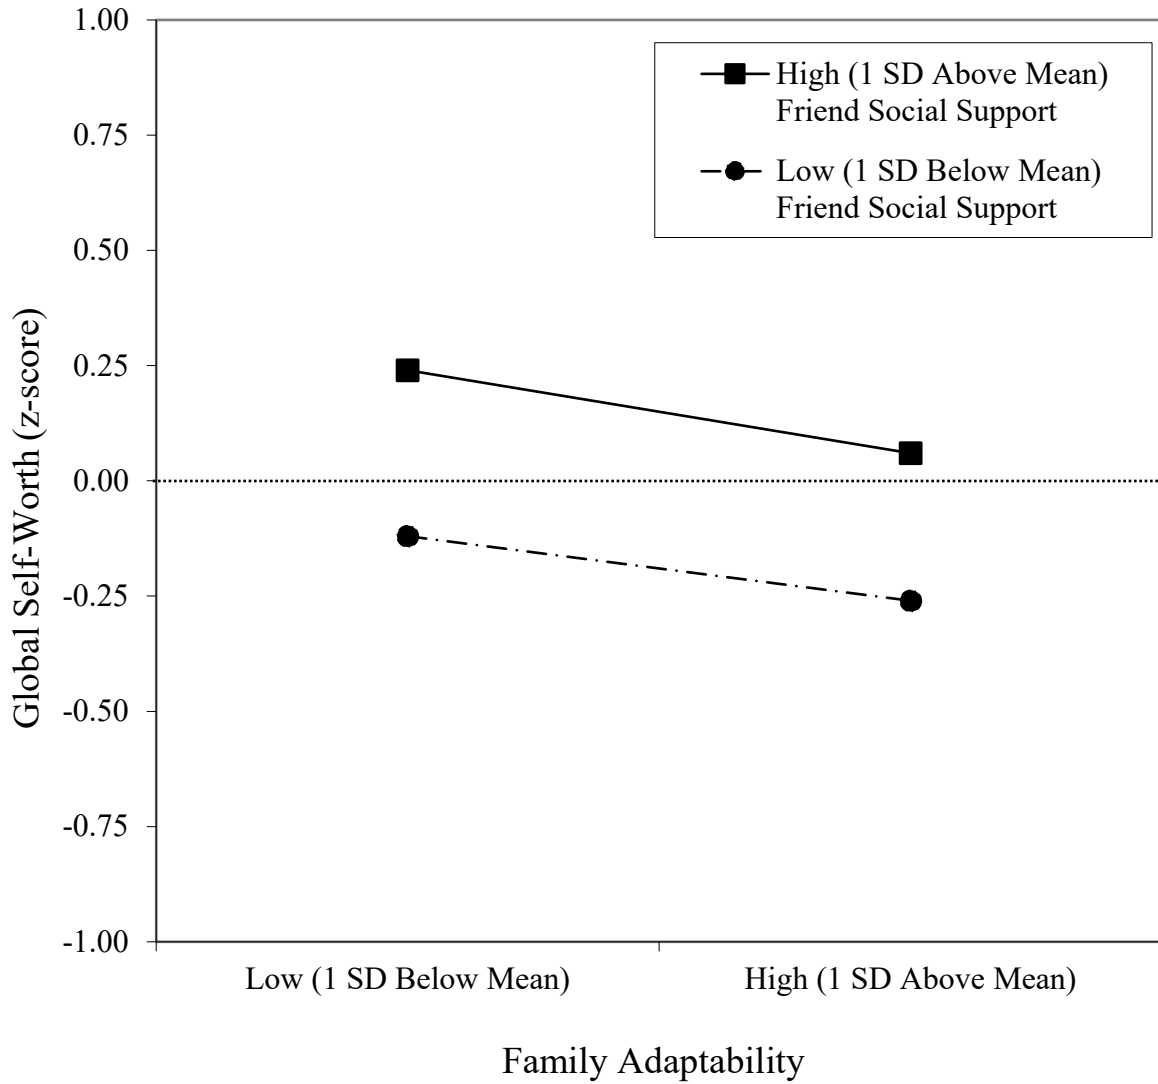

Note:  $N = 550$ .  $K = 2$  samples (samples 3 and 4).

Figure S5. Follow-up plot depicting the nonsignificant interaction between Time 1 friend social support and Time 1 family cohesion in the prediction of Time 2 adolescent global self-worth

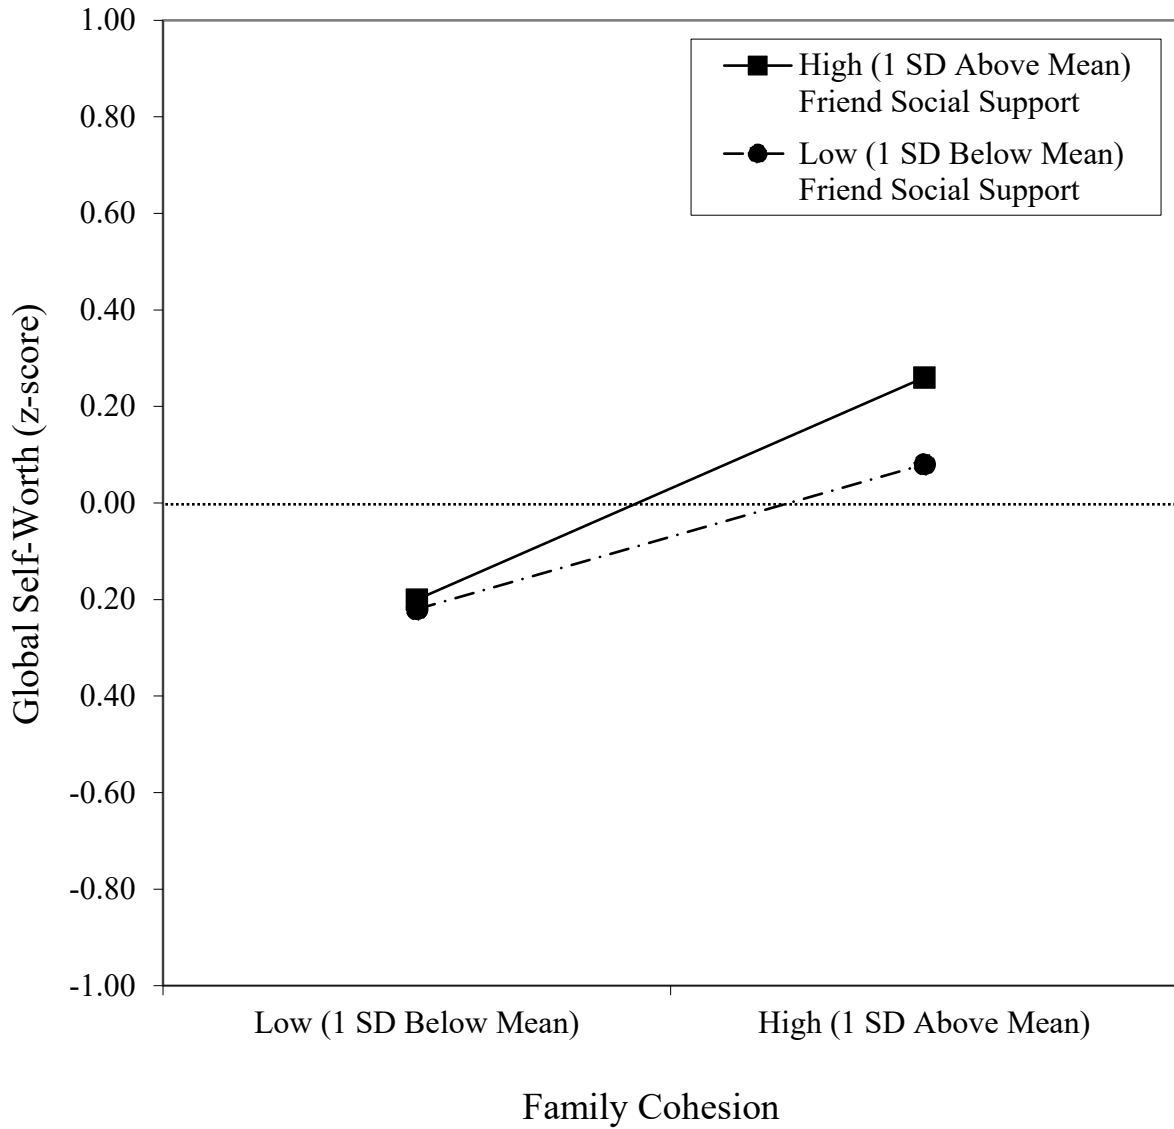

Note:  $N = 550$ .  $K = 2$  samples (samples 3 and 4).



Figure S6. Follow-up plot depicting the nonsignificant interaction between Time 1 friend social support and Time 1 family adaptability in the prediction of Time 2 adolescent global self-worth

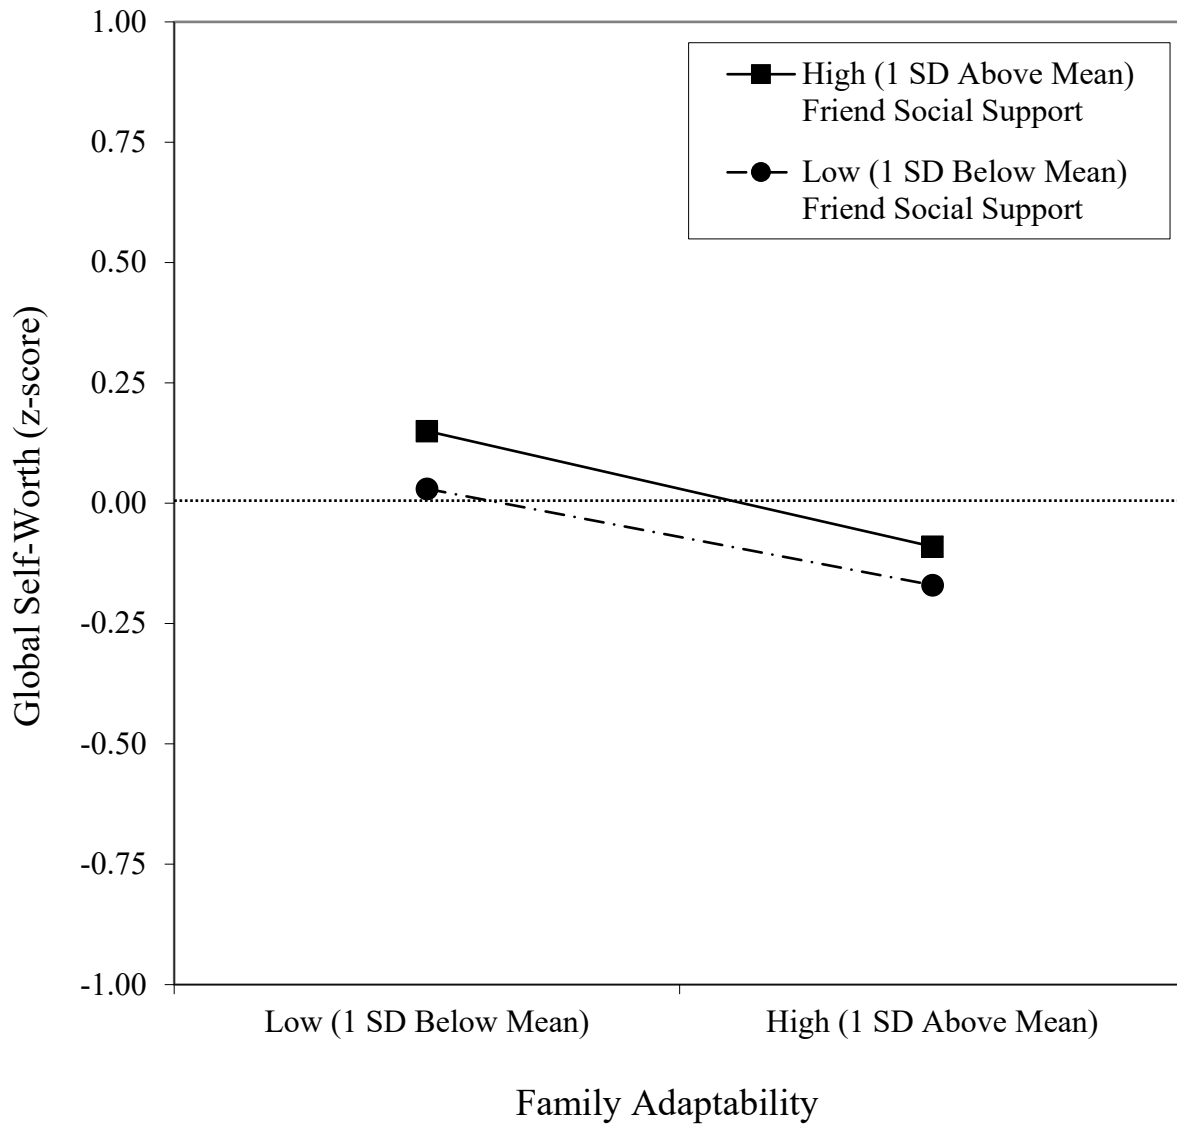

Note:  $N = 550$ .  $K = 2$  samples (samples 3 and 4).
